# Supplementary material for: Extracellular Galectin 4 Drives Immune Evasion and Promotes T-cell Apoptosis in Pancreatic Cancer
Source: PubMed Central journal article supplement (PMC9808371; doi:10.1158/2326-6066.cir-21-1088), 2022-12-20

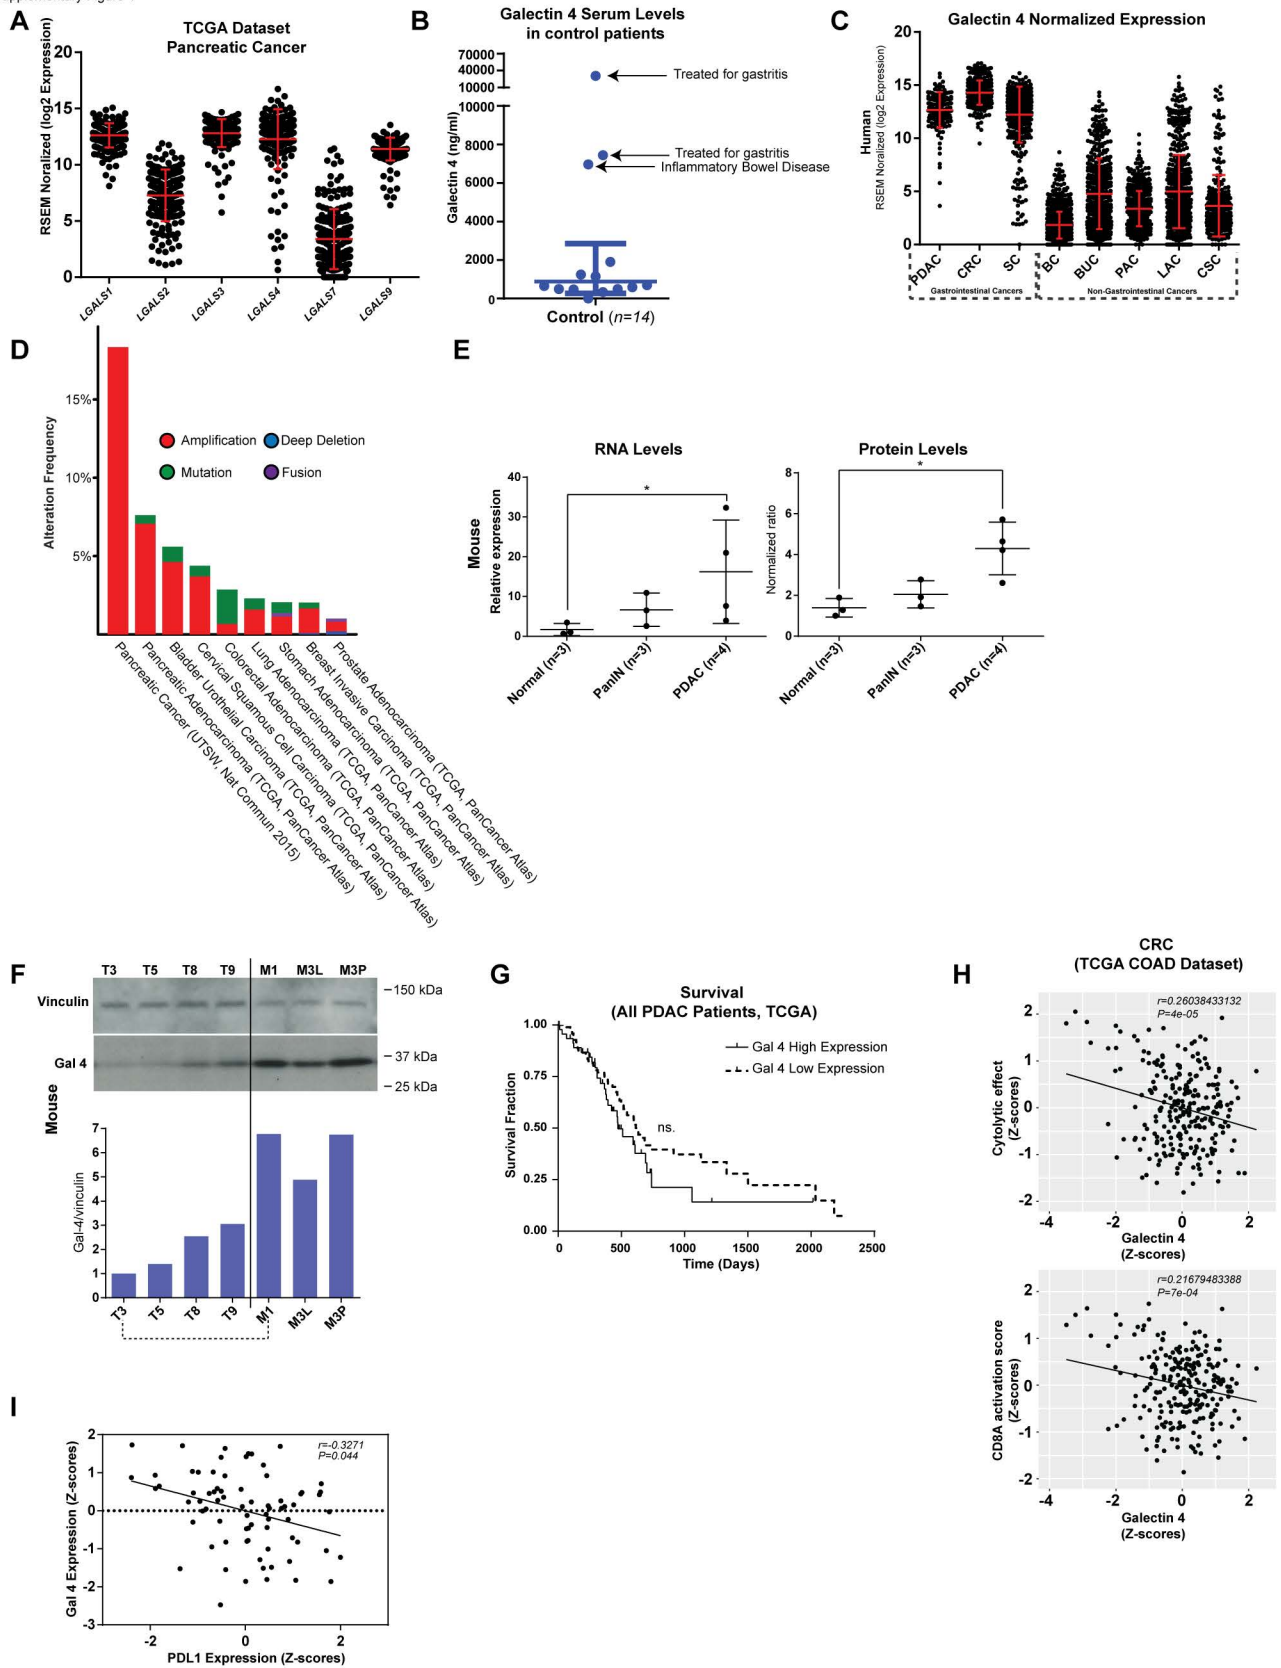

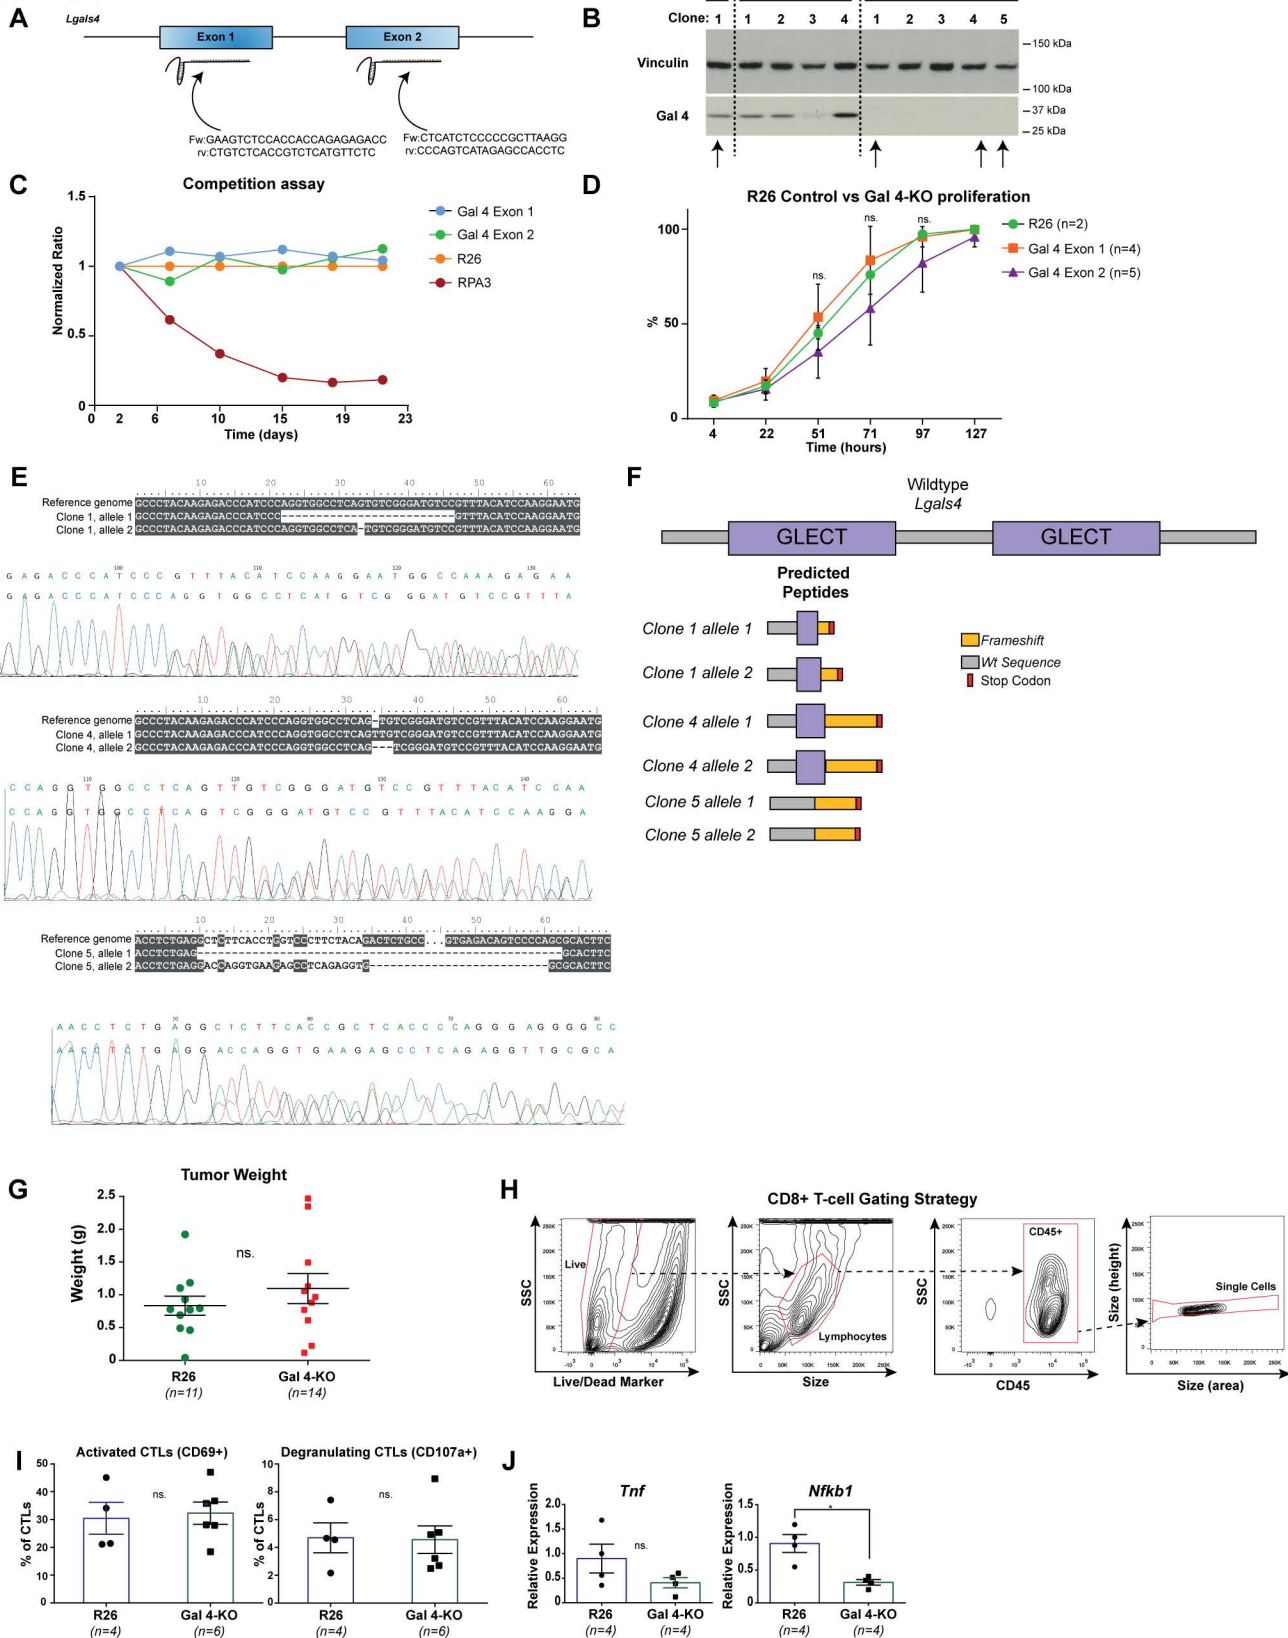

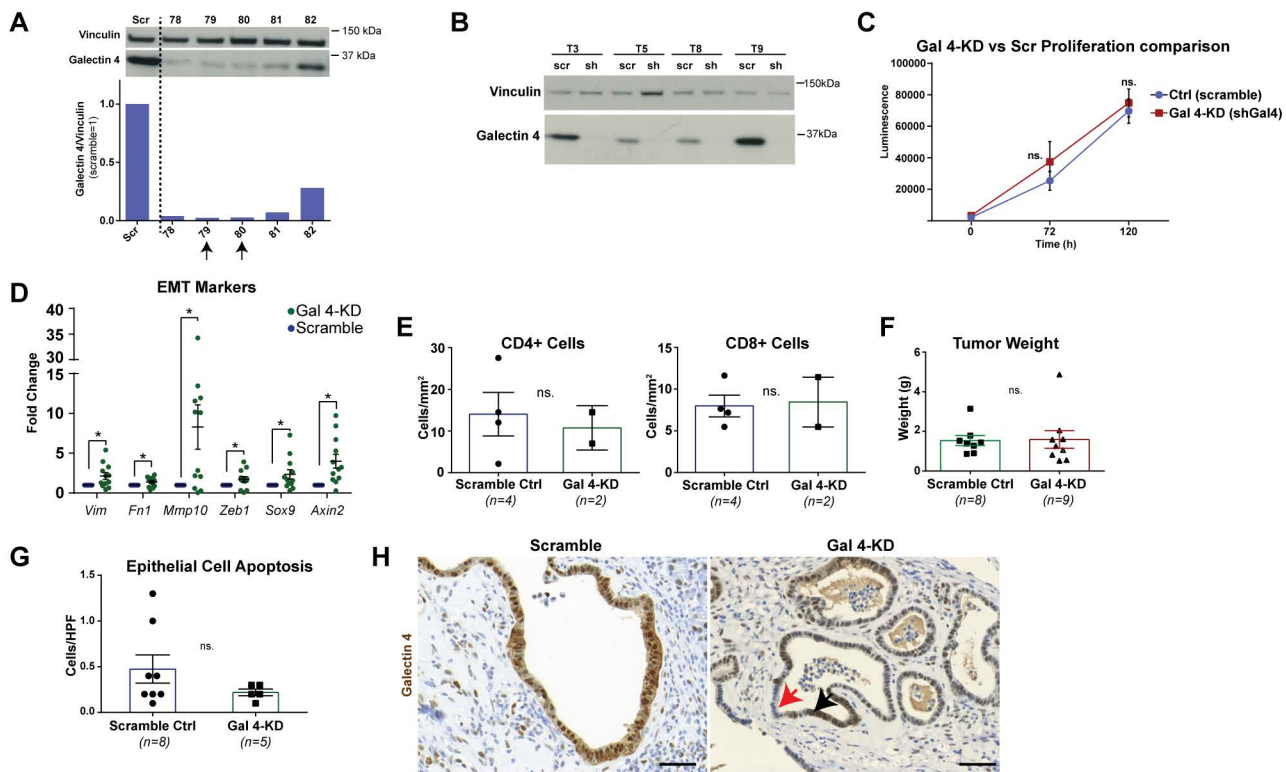

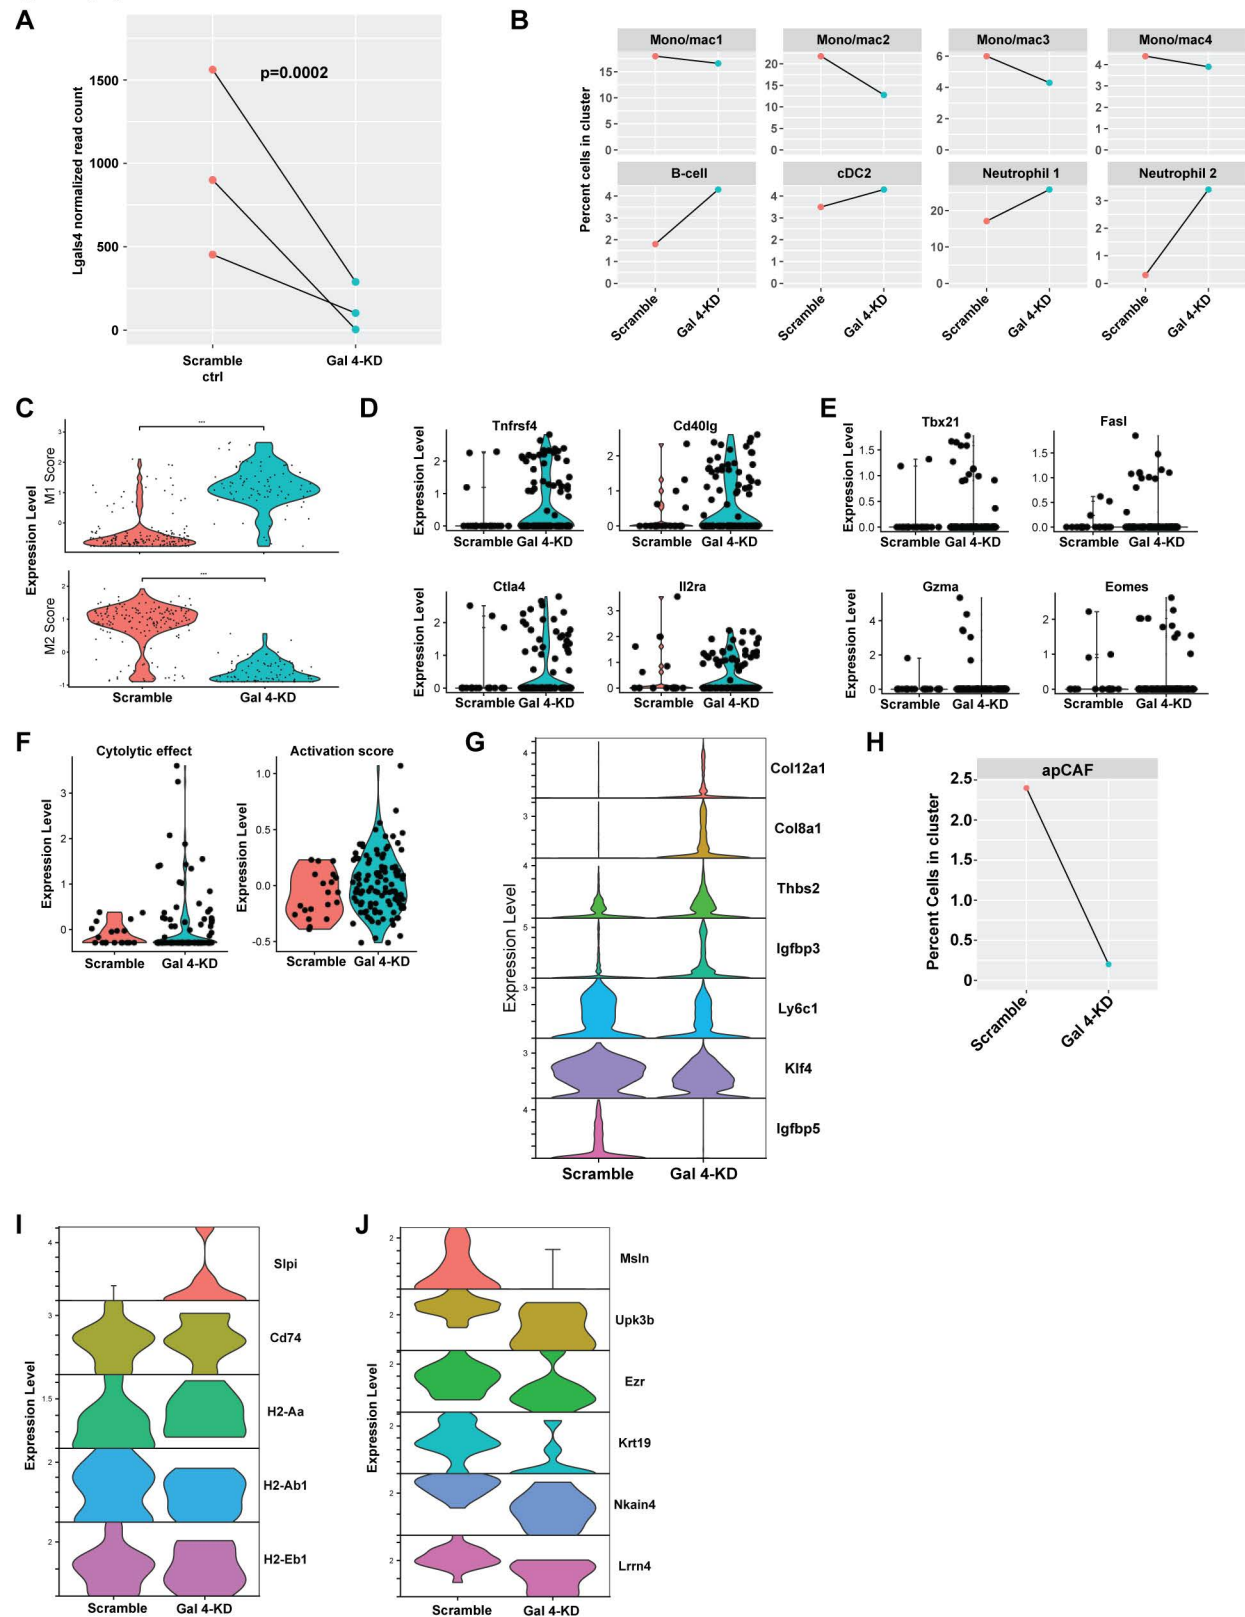

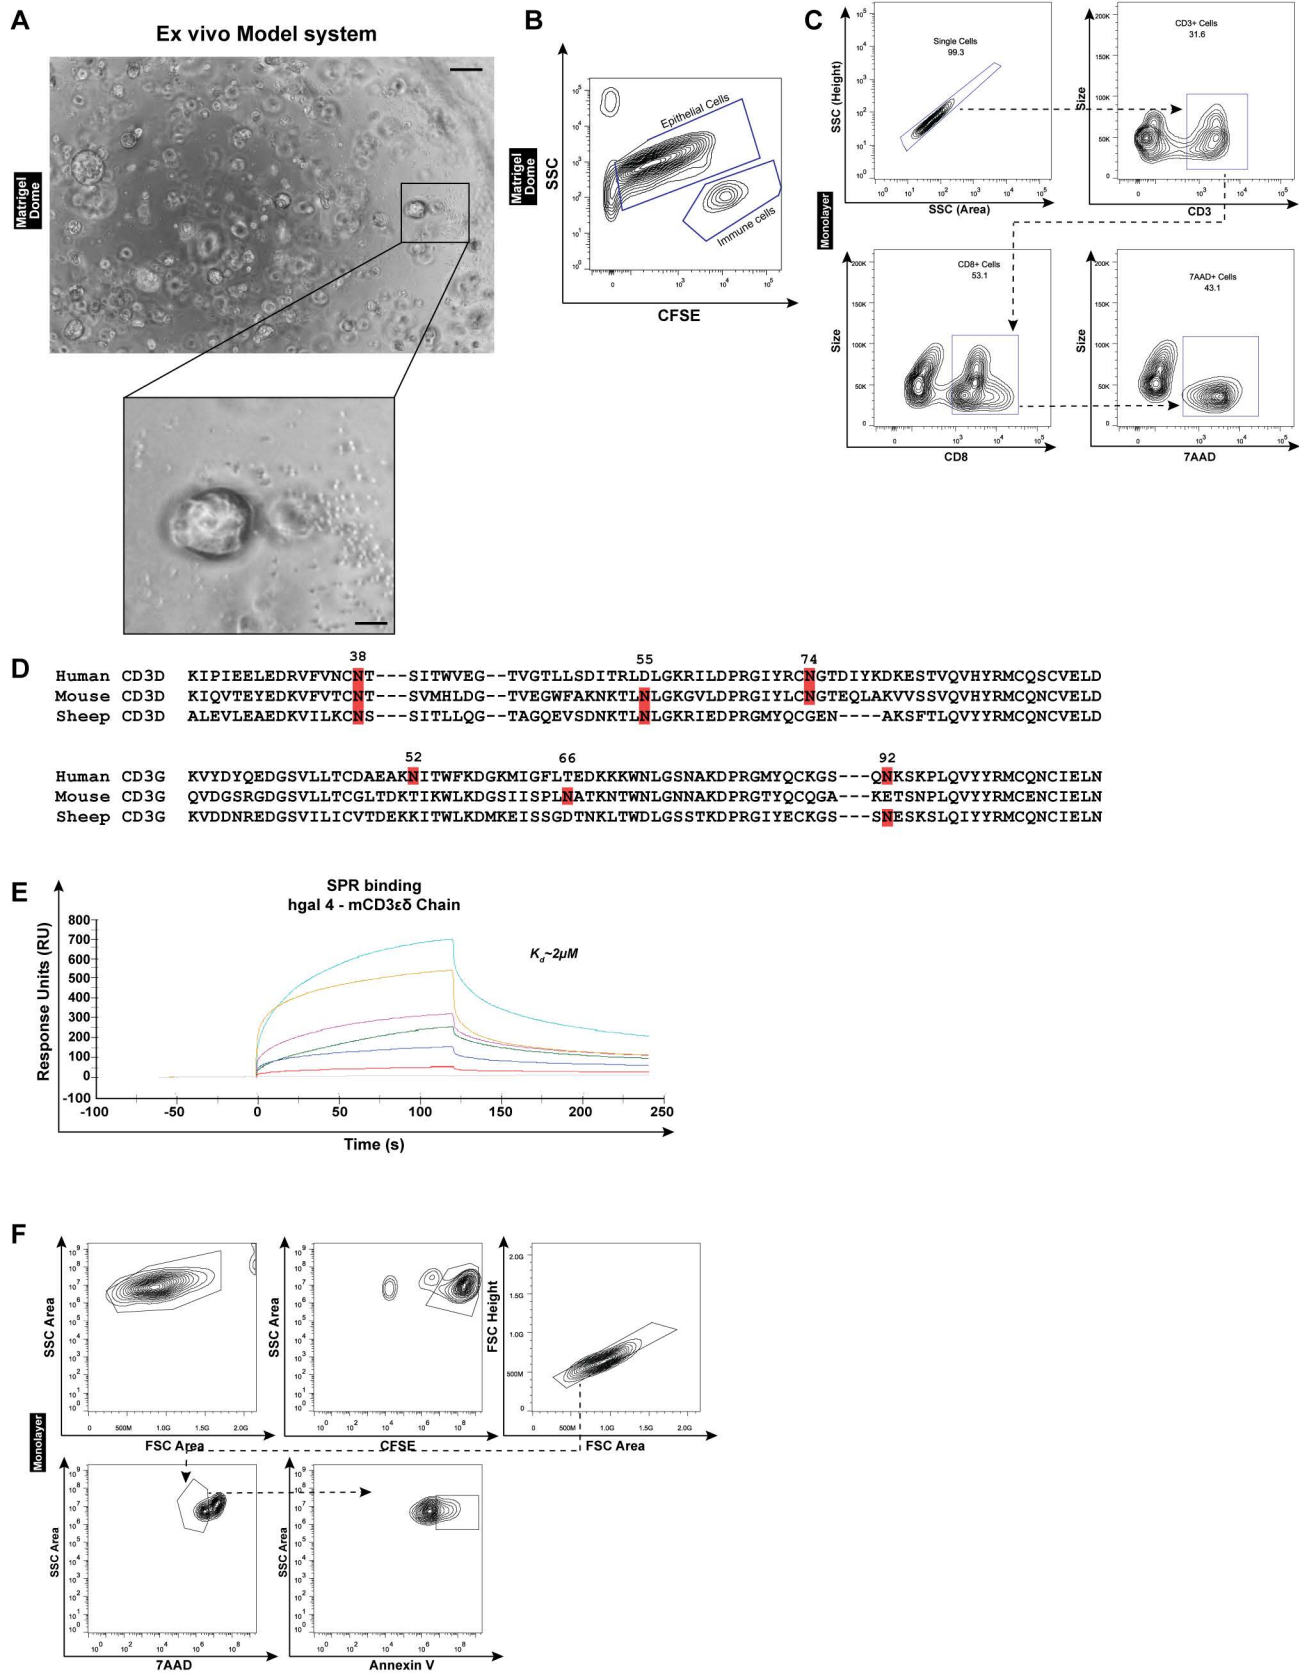

Supplement: cir-21-1088_supplementary_figures_1-5_suppsf1-sf5.pdf [file cir-21-1088_supplementary_figures_1-5_suppsf1-sf5.pdf]
