# Supplementary material for: Extracellular Galectin 4 Drives Immune Evasion and Promotes T-cell Apoptosis in Pancreatic Cancer
Source: PubMed Central journal article supplement (PMC9808371; doi:10.1158/2326-6066.cir-21-1088), 2022-12-20
Supplement: cir-21-1088_supplementary_tables_suppst1.pdf [file cir-21-1088_supplementary_tables_suppst1.pdf]

Supplementary table 1 (Table S1)

| <b>Antibody (target)</b> | <b>Manufacturer</b>  | <b>Dilution</b> | <b>Assay</b> |
|--------------------------|----------------------|-----------------|--------------|
| <i>CD45</i>              | Thermo 69-0451-82    | 1:100           | FACS         |
| <i>CD45</i>              | Thermo 48-0451-82    | 1:100           | FACS         |
| <i>CD3</i>               | Biolegend 100204     | 1:100           | FACS         |
| <i>CD4</i>               | Biolegend 100516     | 1:100           | FACS         |
| <i>CD8a</i>              | BD 563068            | 1:100           | FACS         |
| <i>PD-1</i>              | Biolegend 109103     | 1:50            | FACS         |
| <i>TIM-3</i>             | Biolegend 134009     | 1:50            | FACS         |
| <i>CD326</i>             | Thermo 12-5791-82    | 1:100           | FACS         |
| <i>CD69</i>              | Thermo 47-0691-82    | 1:50            | FACS         |
| <i>CD107a</i>            | Thermo MA5-28671     | 1:50            | FACS         |
| <i>CD4</i>               | Abcam ab183685       | 1:1000          | IHC          |
| <i>CD8a</i>              | Abcam EPR20305       | 1:2000          | IHC          |
| <i>FOXP3</i>             | CST 12653S           | 1:500           | IHC          |
| <i>Cleaved Caspase 3</i> | CST 9579S            | 1:400           | IHC          |
| <i>Gal4 (E-2)</i>        | Santa cruz sc-271209 | 1:200           | IHC          |
| <i>Gal4</i>              | NBP2-48605           | 1:100           | IHC/WB       |
| <i>Gal4</i>              | Santa cruz sc-19286  | 1:200           | WB           |
| <i>Vinculin</i>          | Merck, V4139         | 1:1000          | WB           |

Supplementary table 2 (Table S2)

| <b>Cytolytic Effect</b> | <b>CD8 Activation Score</b> |
|-------------------------|-----------------------------|
| <i>EOMES</i>            | <i>CD69</i>                 |
| <i>TBX21</i>            | <i>CCR7</i>                 |
| <i>GZMB</i>             | <i>CD27</i>                 |
| <i>PRF1</i>             | <i>BTLA</i>                 |
| <i>FASLG</i>            | <i>CD40LG</i>               |
| <i>GZMH</i>             | <i>IL2RA</i>                |
| <i>GZMA</i>             | <i>CD3E</i>                 |
|                         | <i>CD47</i>                 |
|                         | <i>EOMES</i>                |
|                         | <i>GNLY</i>                 |
|                         | <i>GZMA</i>                 |
|                         | <i>GZMB</i>                 |
|                         | <i>PRF1</i>                 |
|                         | <i>IFNG</i>                 |
|                         | <i>CD8A</i>                 |
|                         | <i>CD8B</i>                 |
|                         | <i>FASLG</i>                |
|                         | <i>LAMP1</i>                |
|                         | <i>LAG3</i>                 |
|                         | <i>CTLA4</i>                |
|                         | <i>HLA-DRA</i>              |
|                         | <i>TNFRSF4</i>              |
|                         | <i>ICOS</i>                 |
|                         | <i>TNFRSF9</i>              |
|                         | <i>TNFRSF18</i>             |

Supplementary table 3 (Table S3)

| <b>Primers</b> | <b>forward Sequence</b> | <b>Reverse Sequence</b> |
|----------------|-------------------------|-------------------------|
| <i>Nfkb1</i>   | TCTGGCACAGAAGTTGGGTC    | GGTACCCCCAGAGACCTCAT    |
| <i>Tnf</i>     | CCACCACGCTCTTCTGTCTAC   | AGGGTCTGGGCCATAGAACT    |
| <i>FN1</i>     | GGTCTACGGCAGTTGTCACA    | GCAACGTGCTATGACGATGG    |
| <i>VIM</i>     | GAAATTGCAGGAGGAGATGC    | TCCAATTTCCGTTCAAGGTC    |
| <i>Zeb1</i>    | TGAGCACACAGGTAAGAGGCC   | GGCTTTTCCCCAGAGTGCA     |
| <i>Sox9</i>    | CATTCCTCCTCCGGCATGAG    | TCAACTTTGCCAGCTTGAC     |
| <i>Mmp10</i>   | GGCCCACTCTTCCTCAGAC     | TTCATTTCTCGGACTGCC      |
| <i>Axin2</i>   | TCAAGGAGCAGCTCAGCAA     | CCAGGATCCTGCCTTCGTAC    |
